1 Heritability of the *Symbiodinium* community in vertically- and horizontally-transmitting  
2 broadcast spawning corals

3

4 Kate M. Quigley<sup>1,2\*</sup>, Bette L. Willis<sup>1,2</sup>, Line K. Bay<sup>2,3</sup>

5

6 <sup>1</sup>ARC Centre of Excellence for Coral Reef Studies, and College of Science and  
7 Engineering, James Cook University, Townsville, QLD 4811, Australia

8 <sup>2</sup>AIMS@JCU, Australian Institute of Marine Science and James Cook University,  
9 Townsville, QLD 4811, Australia

10 <sup>3</sup>Australian Institute of Marine Science, PMB3, Townsville, Queensland 4810, Australia

11

12 \*Corresponding author: KM Quigley

13 Address: College of Marine and Environmental Sciences, James Cook University,  
14 Townsville, QLD 4811, Australia

15 Email: [katemarie.quigley@my.jcu.edu.au](mailto:katemarie.quigley@my.jcu.edu.au)

16

17

18

19

20

21

22

23

24

25

26

27

28

29

30

31

32

33

34

35 **Abstract**

36 The dinoflagellate-coral partnership influences the coral holobiont's tolerance to  
37 thermal stress and bleaching. However, the comparative roles of host genetic versus  
38 environmental factors in determining the composition of this symbiosis are largely  
39 unknown. Here we quantify the heritability of the initial *Symbiodinium* communities for  
40 two broadcast-spawning corals with different symbiont transmission modes: *Acropora*  
41 *tenuis* has environmental acquisition, whereas *Montipora digitata* has maternal  
42 transmission. Using high throughput sequencing of the ITS-2 region to characterize  
43 communities in parents, juveniles and eggs, we describe previously undocumented  
44 *Symbiodinium* diversity and dynamics in both corals. After one month of uptake in the  
45 field, *Symbiodinium* communities associated with *A. tenuis* juveniles were dominated by  
46 A3, C1, D1, A-type CCMP828, and D1a in proportional abundances conserved between  
47 experiments in two years. *M. digitata* eggs were predominantly characterized by C15,  
48 D1, and A3. In contrast to current paradigms, host genetic influences accounted for a  
49 surprising 29% of phenotypic variation in *Symbiodinium* communities in the  
50 horizontally-transmitting *A. tenuis*, but only 62% in the vertically-transmitting *M.*  
51 *digitata*. Our results reveal hitherto unknown flexibility in the acquisition of  
52 *Symbiodinium* communities and substantial heritability in both species, providing  
53 material for selection to produce partnerships that are locally adapted to changing  
54 environmental conditions.

## 55 **Introduction**

56 Coral bleaching, defined as either the loss of *Symbiodinium* cells from coral tissues or  
57 reduction in symbiont photosynthetic pigments, represents a threat to coral reefs world-wide  
58 as it increases in both frequency and magnitude<sup>1-4</sup>. If coral reefs are to persist under climate  
59 change, corals must either disperse to new unaffected habitats, acclimate through phenotypic  
60 plasticity, and/or adapt through evolutionary mechanisms<sup>5</sup>. However, the extent to which  
61 thermal tolerance can increase, either through changes to the host genome or *Symbiodinium*  
62 community hosted, or by direct selection on the symbionts themselves, is currently unclear.

63 Bleaching sensitivity is variable within and among species<sup>6</sup>, but comparative roles of  
64 host genetics versus symbiont communities to this variation remain unclear<sup>7,8</sup>. The  
65 *Symbiodinium* community hosted by corals has long been recognized as the primary factor  
66 determining bleaching susceptibility<sup>8,9</sup>. However, host influences are also evident<sup>10-12</sup> and  
67 may play an equally important role in determining bleaching susceptibility. Endosymbiotic  
68 communities could influence host adaptation to changing climates through increased host  
69 niche expansion<sup>13,14</sup>, but a major impediment to understanding the capacity of corals to adapt  
70 to a changing climate is lack of knowledge about the extent to which *Symbiodinium*  
71 communities associated with corals are inherited and hence subject to selection.

72 There are nine recognized *Symbiodinium* clades<sup>15</sup> that encompass substantial  
73 sequence and functional variation at the intra-clade (type) level (reviewed in<sup>16</sup>). Deep  
74 sequencing technologies currently available can detect type level diversity even at low  
75 abundances<sup>17</sup> and are now being applied to understand adult coral-*Symbiodinium* diversity<sup>18-</sup>  
76<sup>20</sup>, but have not yet been applied to the early life-history stages of corals. Therefore, there are  
77 gaps in our basic knowledge of the composition of *Symbiodinium* communities at lower,  
78 functionally relevant taxonomic levels, particularly community members at background  
79 abundances, and in the eggs and juveniles of corals.

80 Natural variation in the composition of coral-associated *Symbiodinium* communities  
81 exists among coral populations and species<sup>16,21</sup>, with certain communities offering greater  
82 bleaching resistance compared to others<sup>22,23</sup>. It is not yet known what enhances or constrains  
83 the capacity of corals to harbour stress-tolerant *Symbiodinium* types and whether changes in  
84 *Symbiodinium* communities in response to environmental stressors are stochastic or  
85 deterministic<sup>24</sup>. Given the importance of *Symbiodinium* communities for bleaching  
86 susceptibility and mortality of the coral holobiont<sup>25,26</sup>, quantifying the proportional  
87 contributions of genetic and environmental factors to community formation, regulation and  
88 stress tolerance is important for understanding coral health. If the *Symbiodinium* community

89 is heritable, changes to these communities may bring about adaptation of the holobiont as a  
90 whole. Under this scenario, *Symbiodinium* community shifts are equivalent to changes in host  
91 allele frequencies, thus opening up new avenues for natural and artificial selection, assisted  
92 evolution and microbiome engineering<sup>24,27</sup>.

93 *Symbiodinium* communities associated with scleractinian corals are either acquired  
94 from the environment (horizontal transfer) or passed maternally from adults to eggs or larvae  
95 (vertical transfer). Approximately 85% of scleractinian coral species broadcast spawn eggs  
96 and sperm into the environment, and of these, ~80% acquire symbionts horizontally; the  
97 remaining ~20% acquire them vertically<sup>28</sup>. Vertically-transmitted symbiont communities are  
98 predominantly found in brooding corals with internal fertilization<sup>28</sup> and are theorized to be of  
99 lower diversity and higher fidelity<sup>16</sup>. Conversely, horizontal transmission has generally been  
100 assumed to result in weaker fidelity that can be increased through the development of strong  
101 genotype associations between hosts and their symbiont community<sup>29</sup>. Studies specifically  
102 quantifying the genetic component governing *Symbiodinium* communities established in  
103 offspring of both horizontal and vertical transmitters are needed to elucidate the potential for  
104 adaptation through symbiont community changes.

105 Heritability describes the genetic components of variability in a trait using analysis of  
106 co-variance among individuals with different relatedness<sup>30</sup>. The ratio of additive genetic  
107 variance to phenotypic variance ( $V_A/V_P$ ) is defined as narrow-sense heritability ( $h^2$ )<sup>31</sup>. The  
108 degree of heritability of a trait ranges from 0 - 1, and describes the influence of parental  
109 genetics on the variability of that trait<sup>31</sup>. Therefore, the degree to which traits might change  
110 from one generation to the next can be predicted from measures of heritability, where the  
111 predicted change in offspring phenotype is proportional to  $h^2$  (i.e., the breeder's equation)<sup>32</sup>.  
112 It is particularly important to determine the genetic contribution to understand the potential  
113 for adaptation and to predict the strength of response to selection (i.e, the 'evolvability' of a  
114 trait)<sup>5,33,34</sup>.

115 To quantify the potential for selection of endosymbiotic *Symbiodinium* communities  
116 associated with broadcast spawning corals in response to changes in environmental  
117 conditions (i.e., climate change-induced), we characterized symbiont communities associated  
118 with adults and juveniles of the horizontal transmitter *Acropora tenuis* and with adults and  
119 eggs of the vertical transmitter *Montipora digitata* using high-throughput sequencing. Using a  
120 community diversity metric, we derived the narrow-sense heritability ( $h^2$ ) of these  
121 communities and identified new and unique *Symbiodinium* types recovered from juveniles  
122 and eggs compared to their parental colonies. Finally, we described previously unknown

123 *Symbiodinium* community dynamics in the early life-history stages of these two common  
124 coral species.

125

## 126 **Results**

### 127 ***Symbiodinium* communities associated with *Acropora tenuis***

128 After one month in the field, there were similarities at the clade level between  
129 *Symbiodinium* communities associated with the 2012 and 2013 families of *A. tenuis* juveniles,  
130 with 54 OTUs (17.1%) shared between the two years, including similar proportions of OTUs  
131 retrieved across the clades in each year (Fig. 1, Supplementary Table S4). In both years, the  
132 majority of OTUs were recovered from three clades (A, C, and D) and the number of OTUs  
133 from each of these clades was similar between years (Supplementary Table S4). The greatest  
134 diversity of OTUs found in juveniles from both years belonged to C1, A3 and “uncultured”  
135 types (see methods for definitions of OTUs), and a diversity of different OTUs within types  
136 A13, A-type CCMP828, D1 and D1a were also present (Supplementary Fig. S1). The  
137 predominant patterns characterising *Symbiodinium* communities associated with the 2012 and  
138 2013 families were the high abundance of *Symbiodinium* types A3, C1, D1, and CCMP828,  
139 and the comparatively lower abundance of D1a (Fig. 2). However, substantial variation in  
140 *Symbiodinium* diversity and abundance existed among juveniles within the same family, as  
141 well as among families of juveniles (Supplementary Results, Fig. 2). For example, juvenile  
142 families differed in their average OTU diversity and abundance, as well as their taxonomic  
143 composition (additional description in Supplementary Results, Fig. 2, Supplementary Table  
144 S5), where particular families contained juveniles of particularly high diversity (families F14  
145 and F18).

146 Juveniles from both years harboured more unique OTUs than adults (juveniles vs.  
147 adults: 111 vs. 2 (2012), 151 vs. 2 (2013)), with comparatively few OTUs shared between life  
148 stages (21 shared in 2012 (out of 422 OTUs); 28 shared in 2013 (out of 568 OTUs)) (Fig. 1).  
149 Furthermore, the majority of OTUs in both years were at background abundances (Fig. 1).  
150 The majority of OTUs were also rare (112 - 172 OTUs found in less than 25% of samples in  
151 2012 and 2013), whilst 4 - 16 OTUs were common (25 -75% of samples) and 5 - 6 OTUs  
152 were core members (two A3 types, CCMP828, C1, D1, D1a were present in greater than 75%  
153 of samples) (Fig. 1).

154

### 155 ***Symbiodinium* communities associated with *Montipora digitata***

156 101 OTUs were found in *M. digitata* eggs and adults, with 7 ( $\pm 0.9$  SE) OTUs per egg  
157 and 5.3 ( $\pm 0.9$  SE) OTUs per adult, on average. The highest diversities of OTUs were  
158 retrieved from clades A (73 OTUs) and C (18 OTUs), whereas D had three OTUs represented  
159 (Fig. 3). 99.1% of the total cleaned reads belonged to C15 (OTU1), with this type making up  
160 98.8 % ( $\pm 0.5$  SE) and 99 % ( $\pm 0.1$  SE) of all reads retrieved from dams and eggs, respectively.  
161 The next most abundant OTUs were C1, D1, and A3 (Fig. 4). Adults could generally be  
162 distinguished from eggs by the unique presence of A2, A3, particular C1 and A3 variants  
163 (C1\_8, HA3-5), G3 (Fig. 3), and a greater proportional abundance of an A type symbiont  
164 (OTU4) in dams 29, 32, 7, 8 and 9 (Fig. 4). Of these unique adult OTUs, none were found in  
165 more than two adult colonies. Eighty-two OTUs were found in eggs but not adults and 43 of  
166 these were found in three or more eggs, and a majority were “uncultured” types at  
167 background levels from the eggs of dam 29 (Fig. 3). Both inter- and intra- family variation in  
168 background *Symbiodinium* OTU composition and abundance were detected within eggs as  
169 well (further description in Supplementary Results, Supplementary Fig. S2, Supplementary  
170 Table S6).

171

### 172 **Narrow-sense heritability of *Symbiodinium* community in *A. tenuis* juveniles and *M.*** 173 ***digitata* eggs**

174 Bayesian linear mixed models, and specifically, the animal model, were used to  
175 estimate relatedness-based heritability as they are robust to unbalanced designs. Furthermore,  
176 the animal model utilizes all levels of relatedness between individuals in a given dataset, and  
177 not just parent-offspring comparisons<sup>35</sup>. The Bayesian narrow-sense heritability estimate ( $h^2$ )  
178 of the initial *Symbiodinium* community in *A. tenuis* juveniles was 0.29, with a 95% Bayesian  
179 credibility interval for the additive genetic component of 0.06-0.86. The mean heritability  
180 was 0.36 ( $\pm 0.21$  SD) (Fig. 5). The high density of estimates between 0.2 - 0.4 within the  
181 posterior distribution of  $h^2$  suggests high statistical support around 0.29, despite the  
182 credibility interval being very large. The maternal transfer of *Symbiodinium* in the broadcast  
183 spawning coral *M. digitata* had a narrow-sense heritability estimate of 0.62 (0.27-0.86 95%  
184 Bayesian credibility interval), with a mean heritability of 0.57 ( $\pm 0.16$  SD) (Fig. 5). We did  
185 not detect an effect of maternal environment on similarities in *Symbiodinium* diversity among  
186 eggs or among juveniles. Models that included maternal effects arising from eggs developing  
187 in a shared environment (maternal environmental effects for both *A. tenuis* and *M. digitata*)  
188 were not significantly better than those that did not include maternal effects (DIC no effects <  
189 DIC maternal environmental effects included).

190 Mid-parent regression estimates for the 29 *A. tenuis* families from 2012 and 2013  
191 indicated that trait-based  $h^2$  of the *Symbiodinium* community was 0.3 (Supplementary Fig.  
192 S3). Parent-offspring regression of the 99 *M. digitata* eggs genotyped from nine dams  
193 resulted in a heritability estimate of 0.16 (slope= 0.078 x 2 as a single parent) (Supplementary  
194 Fig. S4). Therefore, 30% and 16% of the measured variation in the *Symbiodinium* community  
195 in *A. tenuis* and *M. digitata*, respectively, was due to genetic differences among offspring.

196

### 197 **Impact of intragenomic variation on heritability analysis:**

198 Simulating intragenomic variants in the *M. digitata* dataset yielded five intragenomic  
199 variant groups from clade A (IGV1\_A: OTU\_65/74/113/123/121; IGV2\_A: 29/23/133;  
200 IGV3\_A: 68/32; IGV4\_A:61/70; IGV5\_A: 56/75), and one from clade C (IGV6\_C: 128/42).  
201 OTUs from clade D were not highly similar and correlation coefficients for the three clade F  
202 OTUs had relatively low correlation coefficients (0.3-0.6). The diversity metric and Bayesian  
203 MCMC heritability was re-calculated with these 16 OTUs collapsed into their respective six  
204 intragenomic variants. The resulting  $h^2$  estimate was slightly higher ( $0.5754 \pm 0.157$  compared  
205 to the original estimate of  $0.5722 \pm 0.157$ ).

206

### 207 **Discussion**

208 Substantial heritability of the initial *Symbiodinium* community in early life history  
209 stages of both vertically- and horizontally-transmitting corals highlights the important role of  
210 host genetics in governing the composition of symbiont communities within their tissues.  
211 Surprisingly, mean Bayesian heritability estimates for initial *Symbiodinium* communities  
212 associated with juveniles of *Acropora tenuis* were moderate (0.29), but higher than expected  
213 given low levels of fidelity assumed for species with environmentally-acquired symbionts.  
214 Conversely, heritability estimates associated with eggs of *Montipora digitata* were high  
215 (0.62), but lower than expected given the high levels of fidelity expected for vertically-  
216 transmitted symbionts. Given that heritability is a quantifiable measure of the influence of  
217 genes compared to environmental factors in shaping phenotypes, both non-zero heritability  
218 estimates confirm that genes do influence the structuring of *Symbiodinium* communities in  
219 these two coral species. Although our results differ from expectations of fidelity and  
220 heritability based on current transmission paradigms in corals, they are consistent with  
221 studies that have demonstrated the role of host genetics in governing the composition of  
222 symbiotic bacterial communities in mammals, insects and other cnidarians<sup>36-39</sup>, as well as the  
223 abundance of bacteria in insects<sup>40</sup> and humans<sup>41</sup>. Furthermore, these estimates are consistent

224 with the characteristic hallmarks of host-controlled symbiont regulation. For example,  
225 *Symbiodinium* cells are enveloped in a host-derived symbiosome, with only a few (2-8)  
226 symbiont cells per host membrane<sup>42</sup>. This suggests that the coral host may regulate  
227 *Symbiodinium* on an almost individual cell basis, facilitating overall population regulation<sup>40</sup>  
228 and potentially community composition within the holobiont. Thus, it is likely advantageous  
229 for the host's molecular architecture governing the *Symbiodinium* community to be passed  
230 from one generation to the next. Importantly, the partial genetic regulation of *Symbiodinium*  
231 communities found here suggests that there is potential for the symbioses to evolve and  
232 adapt, and therefore to potentially develop 'optimal' symbiont-host partnerships under  
233 changing environmental conditions.

234 Our results provide the first in-depth picture of the complexity of the *Symbiodinium*  
235 community in *A. tenuis* juveniles during the initial month of uptake. No juveniles exclusively  
236 hosted a single clade or type, a result corroborated by lab and other field-based experimental  
237 studies<sup>43-48</sup>. Moreover, although the diversity measured here was much greater than values  
238 reported in previous studies, we found temporal stability in cladal diversity and abundances  
239 between the two years. It is possible that the temporal stability detected at the clade level  
240 within juveniles was in part due to the stability of locally available symbionts, either from the  
241 sediments or from the continual seeding of symbionts into local environments by resident  
242 symbiont-bearing cnidarians<sup>49</sup>. Such environmental variance is partitioned in the MCMC  
243 animal model (along with genetic effects due to relatedness) and hence accounted for in  
244 heritability estimates. Therefore, stability in the availability of environmental *Symbiodinium*  
245 and its subsequent impact on temporal stability of coral-associated *Symbiodinium*  
246 communities would be accounted for in heritability estimates. The unexpectedly high fidelity  
247 of the symbiont community, in conjunction with our heritability estimates, suggest strong  
248 host genetic – symbiont community associations, a result also implicated in studies  
249 comparing symbiosis fidelity across phylogenetic associations in *Hydra*, wasps, and primates  
250<sup>29</sup>. Further work is needed to document *Symbiodinium* diversity in juveniles of broadcast  
251 spawning corals, as well as to elucidate molecular mechanisms regulating the establishment  
252 of this symbiosis.

253 Our conclusion of active host regulation based on heritability estimates, coupled with  
254 temporal stability in the relative proportions and numbers of OTUs within clades at principal  
255 and background levels between years, suggest that genetic regulation governing  
256 *Symbiodinium* communities extends to clades found at very low abundance. The roles of  
257 many background *Symbiodinium* types remain unclear and may be minor compared to



258 principal types like A3, C1, and D1 when corals are healthy. However, *Symbiodinium* at  
259 background abundances can be important for coral health under sub-optimal environmental  
260 conditions. For example, fine scale dynamics of *Symbiodinium* communities (i.e., changes in  
261 relative abundance and/or diversity of only a fraction of types) impact host bleaching  
262 susceptibility, recovery and physiology<sup>23,26,50,51</sup>. Growing evidence suggests that background  
263 types are important in several *Symbiodinium*-coral symbioses during recovery from stress  
264 (i.e. *Acropora millepora* and D-types<sup>23</sup>, *Agaricia* spp., *M. annularis*, *M. cavernosa*-D1a<sup>50,52</sup>,  
265 *Pocillopora damicornis*, *Stylophora pistilata*-C\_I:53<sup>19</sup>), but may not be relevant for all (i.e.  
266 *Acropora japonica*- and *S. voratum*<sup>53</sup>). A strong functional role of background *Symbiodinium*  
267 types would not be surprising given the functional importance of background bacterial  
268 lineages recently described for corals<sup>54,55</sup>, but remains to be conclusively established for  
269 many coral-*Symbiodinium* associations.

270         The heritability signal derived from Bayesian models found for *Symbiodinium*  
271 communities associated with eggs of the vertically-transmitting coral *M. digitata* was  
272 predictably strong (62%) given that the dominant C15 OTU was harboured in adults and eggs  
273 at very high abundances. However, fidelity was less than expected given that eggs acquire  
274 *Symbiodinium* communities in the maternal environment. This lower than expected  
275 heritability signal is mirrored when the likenesses between dams and eggs are compared. For  
276 example, despite *Symbiodinium* C15 dominating symbiont communities in both eggs and  
277 dams, maternal transfer lacked precision in one dam in particular (dam 29), whose eggs had  
278 highly variable *Symbiodinium* communities that included “uncultured” OTUs, similar to  
279 previous reports for another species in this genus<sup>56</sup>. It should be noted that, on average, *M.*  
280 *digitata* dams transmitted C15 so that it comprised 99% of the *Symbiodinium* community in  
281 all eggs, suggesting that a larger heritability estimate might have been expected. The  
282 posterior distribution of the heritability estimates also suggests that the value could resolve to  
283 be larger with increased sampling (up to 0.85). However, the lower than expected heritability  
284 reflects the fact that all *Symbiodinium* in eggs were considered, not just the OTU in greatest  
285 abundance. Therefore, the presence of other symbionts (although in low abundance and  
286 number) lowered the heritability estimate. The incorporation of all *Symbiodinium*, and not  
287 just the numerically dominant one, in heritability calculations is ecologically relevant, given  
288 the important role that low abundance microbes have in coral physiology and stress tolerance  
289 (clade D *Symbiodinium*<sup>57,58</sup>, and bacteria<sup>54,55</sup>).

290

291

292           There are many precedents for inexact maternal transfer of symbiont communities,  
293 and studies on insects show that vertical transmission is rarely perfect<sup>59</sup> due to symbiont  
294 competition within hosts<sup>60</sup>. Such imprecision in maternal transfer is a product of fitness costs  
295 associated with the maintenance of superinfections (stable coexistence of multiple symbionts)  
296 and can be overcome if selection for coexistence is greater than costs associated with their  
297 maintenance<sup>60</sup>. Superinfections may provide a diversity of beneficial symbiont traits. For  
298 example, different symbionts provide different nutrients to host insects<sup>61</sup>. For *M. digitata*,  
299 imprecision may represent a bet-hedging strategy to maximise the likelihood that some  
300 offspring will survive when eggs are dispersed and encounter environments that are different  
301 to their parents. Although some of these background OTUs may represent random  
302 contaminants (i.e. symbionts attached to the outside of eggs), a majority of OTUs were found  
303 in three or more independent egg samples, suggesting that they indeed represent either  
304 relevant symbiont candidates or intragenomic variants retrieved from relevant symbiont  
305 candidates. However, it is unlikely that these OTUs are intragenomic variants given the  
306 clustering method and clustering identity threshold used in this study (Materials and  
307 Methods: Sequencing of *Symbiodinium* ITS-2 in egg, juvenile and adult coral samples).  
308 Although many of these background OTUs existed predominantly at less than 1% abundance  
309 in adults and eggs, it is feasible that these OTUs may grow in abundance to become dominant  
310 members of the community if environmental conditions change<sup>50</sup>, as was found for C.28 and  
311 C\_I:53 in *P. damicornis*<sup>19</sup>. This variation highlights potential flexibility in the *M. digitata*-  
312 *Symbiodinium* symbiosis, which may enable the host to vary its symbiotic partnerships in  
313 response to environmental change by benefitting from new host-symbiont combinations.

314           Surprisingly, much of the diversity found in *M. digitata* eggs was not present in parent  
315 colonies, similar to results reported for larvae of the brooding, vertically-transmitting coral  
316 *Seriatopora hystrix* (Quigley et al. *in-review*) and observed here between *A. tenuis* juveniles  
317 and adults (this study). Our results suggest that eggs acquire symbionts from sources external  
318 to the maternal transmission process. Mixed systems involving both vertical and horizontal  
319 transmission are known (e.g. bacteria in clams; reviewed in<sup>29</sup>) and have recently been  
320 demonstrated in brooding corals (Quigley et al. *in-review*). Given that the cellular machinery  
321 needed for recognition of appropriate *Symbiodinium* types<sup>42</sup> would not be developed in egg  
322 cytoplasm, where *Symbiodinium* are present pre-fertilization<sup>62</sup>, eggs exposed to transient  
323 symbionts in the dam's gastrovascular cavity or by parasitic *Symbiodinium*-containing  
324 vectors (e.g. ciliates<sup>63</sup> and parasites<sup>60</sup>) may retain these communities until recognition  
325 systems of eggs, larvae or juveniles mature. Interestingly, one type (OTU111) found in three

326 eggs from dam 29 was identified as a free-living A type recovered from Japanese marine  
327 sediments (EU106364<sup>64</sup>), supporting the hypothesis that such unique OTUs in eggs may  
328 represent non-symbiotic, potentially opportunistic symbionts. Further work is needed to  
329 determine what ecological roles these symbionts potentially fulfil and their systematic  
330 relationships. For example, a high number of “uncultured” types suggest considerable  
331 taxonomic uncertainty, as has been observed for clade E *Symbiodinium* (see discussion in<sup>65</sup>).

332 Maternal environmental effects, such as lipid contributions by dams, have well known  
333 effects on the early life stages of many marine organisms<sup>66</sup>. However, our Bayesian models  
334 were not significantly improved by the addition of dam identity, suggesting that significant  
335 heritability estimates are attributable to genetic effects and not due to maternal environmental  
336 effects<sup>35</sup> or cytoplasmic inheritance<sup>67</sup>. Whilst we can only speculate about the exact  
337 mechanisms that are being inherited by offspring, likely candidates include those involved in  
338 recognition and immunity pathways<sup>42</sup>, with cell-surface proteins playing an important role in  
339 the selection of specific *Symbiodinium* strains by coral hosts<sup>68–70</sup>. For example, these may  
340 include Tachylectin-2-like lectins, which have been implicated in the acquisition of A3 and a  
341 D-type in *A. tenuis*<sup>43,71,72</sup>. Indeed, suppression or modification of the immune response has  
342 often been implicated in the formation of *Symbiodinium*-cnidarian partnerships<sup>42,73,74</sup>.  
343 Although this has not yet been demonstrated in corals, human studies have shown that  
344 immune system characteristics underpin heritable components of the genome<sup>75</sup> and at least  
345 151 heritable immunity traits have been characterized, including 22 cell-surface proteins<sup>76</sup>.

346 Juvenile corals may be primed to take up specific *Symbiodinium* types through the  
347 transfer of genetic machinery that results in a by-product(s) that ensures juveniles are  
348 colonized by beneficial types and prevents colonization by unfavourable symbionts through  
349 competitive exclusion (e.g., maternal imprinting controlled by offspring loci<sup>67</sup>). Such by-  
350 products may be akin to amino acids, which have been shown to regulate the abundances of  
351 *Symbiodinium* populations<sup>77</sup>. Sugars have also been found to influence bacterial communities  
352 in corals<sup>78</sup> and may have similar roles in regulating *Symbiodinium* communities. Trehalose,  
353 in particular, has been identified as an important chemical attractant between *Symbiodinium*  
354 and coral larvae and may help to regulate the early stages of symbiosis<sup>79</sup>. Human studies also  
355 provide examples of sugars (both maternal and offspring derived) that make infant intestines  
356 less habitable for harmful bacteria, setting up conditions for preferential colonization by  
357 favourable bacteria<sup>80</sup>. Bacterial diversity in cnidarian hosts can also be modulated through  
358 the production of antimicrobial peptides<sup>36</sup> and bacterial quorum sensing behaviour<sup>81</sup>.  
359 Although neither of these mechanisms has been explored with respect to the regulation of

360 *Symbiodinium* in corals, similar host/symbiont by-products may be influential in the  
361 regulation of *Symbiodinium* communities.

362 Heritability estimates based on parent-offspring regression and Bayesian MCMC  
363 methods were similar in *A. tenuis* but not in *M. digitata*. Differences between the estimates of  
364 these two methods for *M. digitata* may be due to the purely maternal basis of inheritance in  
365 this species, with the slope of parent-offspring regressions potentially more accurate for traits  
366 that are transmitted following sexual reproduction involving two parents. Alternatively,  
367 Bayesian MCMC methods, which do not rely on phenotypic information of parents, and  
368 instead only utilize information on relatedness among offspring and co-variances between  
369 them in the phenotypic trait being measured, may be more robust to a variety of different  
370 reproductive modes across organisms. Furthermore, outplanting juveniles to only one  
371 location may have introduced bias into the regression-based estimates, causing juveniles and  
372 adults from the OI location to appear more similar, potentially because they were exposed to  
373 similar environmental pools of symbionts, compared to juveniles from PCB parents.  
374 However, concordance between Bayesian (which do not rely on parental phenotypic  
375 information) and regression-based estimates suggests that this bias is negligible. Standard  
376 errors calculated in heritability studies are normally large<sup>5</sup> but Bayesian MCMC methods are  
377 robust, as they allow for estimation of heritability and statistical support of that estimate  
378 directly from posterior distributions. Therefore, although credibility intervals calculated were  
379 large, high densities of posterior distributions around our heritability estimates signify that  
380 these values are the most probable compared to values at lower posterior densities. This  
381 Bayesian method for determining uncertainty is robust, especially compared to frequentist  
382 methods where standard errors are approximate<sup>5</sup>.

383 In conclusion, results presented here provide new insights into the role of host  
384 genetics and inheritance in governing *Symbiodinium* communities in corals. This information  
385 is important for determining the potential for host-symbiont partnerships to evolve.  
386 Variability in the symbiont community within and among families and evidence that variation  
387 is heritable, as supported by the moderate to high heritability estimates found, corroborate the  
388 likelihood that adaptive change is possible in this important symbiotic community. These  
389 results may also aid in the development of active reef restoration methods focused on assisted  
390 evolution of hosts and symbionts, in which targeted traits with moderate to high heritability  
391 increase the efficacy of breeding schemes. Adaptive change through heritable variation of  
392 symbionts is therefore another mechanism that corals may use to contend with current and  
393 future stressors, such as climate change.

394

## 395 **Materials and Methods**

### 396 **Experimental breeding design and sample collection**

397 For crossing experiments, gravid colonies of the horizontally-transmitting broadcast-  
398 spawning coral *Acropora tenuis* were collected in 2012 and 2013 from the northern (Princess  
399 Charlotte Bay (PCB): 13°46'44.544"S, 143°38'26.0154"E) and central Great Barrier Reef  
400 (GBR) (Orpheus Island: 18°39'49.62"S, 146°29'47.26"E).

401 In 2012, nine families of larvae were produced by crossing gametes from four corals  
402 (OI: A-B, PCB: C-D) on 2 December following published methods<sup>82</sup>. The nine gamete  
403 crosses excluded self-crosses (Supplementary Table S1). Larvae were stocked at a density of  
404 0.5 larvae per ml in one static culture vessel per family in a temperature-controlled room set  
405 at 27°C (ambient seawater temperature). Water was changed one day after fertilization and  
406 every two days thereafter with 1 µM filtered seawater at ambient temperature. To induce  
407 settlement, 25 settlement surfaces (colour-coded glass slides) were added to each larval  
408 culture vessel six days post-fertilization, along with chips of ground and autoclaved crustose  
409 coralline algae (CCA, *Porolithon onkodes* collected from SE Pelorus: 18°33'34.87"S,  
410 146°30'4.87"E). The number of settled juveniles was quantified for each family, and then  
411 placed randomly within and among the three slide racks sealed with gutter guard mesh. The  
412 racks were affixed to star pickets above the sediments in Little Pioneer Bay (18°36'06.2"S,  
413 146°29'19.1"E) 11 days post fertilization. Slide racks were collected 29 days later (11  
414 January 2013), after which natural infection by *Symbiodinium* was confirmed with light  
415 microscopy. Juveniles from each cross were sampled (n = 6 - 240 juveniles/family,  
416 depending on survival rates), fixed in 100% ethanol and stored at -20°C.

417 In 2013, 25 families were produced from gamete crosses among eight parental  
418 colonies: four from PCB and four from Orpheus Island (full details of colony collection,  
419 spawning, crossing and juvenile rearing in<sup>82</sup> (Supplementary Table S2). Larvae were raised  
420 in three replicate cultures per family. Settlement was induced by placing autoclaved chips of  
421 CCA onto settlement surfaces, which were either glass slides, calcium carbonate plugs or the  
422 bottom of the plastic culturing vessel. Settlement surfaces with attached juveniles were  
423 deployed randomly, 19 days post fertilization, at the same location in Little Pioneer Bay as in  
424 2012, and collected 26 days later. Samples of juveniles (n = 1 - 194 juveniles per family)  
425 were preserved and stored as in 2012.

426 Thirty-two gravid colonies of the vertically-transmitting broadcast spawner  
427 *Montipora digitata* were collected from Hazard Bay (S18°38.069', E146°29.781') and

428 Pioneer Bay (S18°36.625', E146°29.430') at Orpheus Island on the 30<sup>th</sup> of March and 1<sup>st</sup> of  
429 April 2015. Colonies were placed in constant-flow, 0.5 µM filtered seawater in outdoor  
430 raceways at Orpheus Island Research Station. Egg-sperm bundles were collected from a total  
431 of nine colonies on the 4<sup>th</sup> and 5<sup>th</sup> of April, separated with a 100 µm mesh and rinsed three  
432 times. Individual eggs and adult tissue samples were then placed in 100% ethanol and stored  
433 at -20°C until processing.

434

### 435 **Sequencing of *Symbiodinium* ITS-2 in egg, juvenile and adult coral samples**

436 The number of juveniles of *A. tenuis* sequenced from each of the 9 crosses in 2012  
437 ranged from 2 - 29 individuals (average ± SE: 11.3 ± 3) (Supplementary Table S1) and a  
438 single sample from each parental colony was sequenced concurrently. In 2013, 1 - 21 *A.*  
439 *tenuis* juveniles (average ± SE: 8.6 ± 1) were sequenced from each of the 20 families (of the  
440 original 25) that survived field deployment (Supplementary Table S2). The adult samples  
441 sequenced included three samples per colony from Orpheus parents (from the edges and  
442 center of each colony) and one sample per colony for Princess Charlotte Bay parents. For *M.*  
443 *digitata*, 5 - 12 eggs per dam were sequenced, along with one sample per maternal colony.

444 DNA was extracted from juveniles of *A.tenuis* in 2012 and 2013 with a SDS method  
445 <sup>82</sup> (additional description in Supplementary Methods). For *M. digitata*, single egg extractions  
446 used the same extraction buffers and bead beating steps as described in <sup>82</sup>, although without  
447 the subsequent washes and precipitation steps because of the small tissue volumes of single  
448 eggs <sup>83</sup>. Library preparation, sequencing and data analysis were performed separately for  
449 2012 and 2013 samples of *A. tenuis* and *M. digitata*, as described in <sup>82</sup>. Briefly, the  
450 USEARCH pipeline (v. 7) <sup>84</sup> and custom-built database of all *Symbiodinium*-specific NCBI  
451 sequences were used to classify reads <sup>85,86</sup>, with blast hits above an E-value threshold of  
452 0.001 removed, as they likely represented non-specific amplification of other closely-related  
453 species within the Dinoflagellata phylum (Supplementary Table S3). Cleaned reads were  
454 clustered with the default 97% identity and minimum cluster size of 2 (thus eliminating all  
455 singleton reads), after which all reads were globally aligned to 99% similarity with gaps  
456 counted as nucleotide differences.

457 *Symbiodinium* databases suggest that hundreds of subclades and types exist within  
458 *Symbiodinium* clades <sup>87,88</sup>. These subclades and types likely represent distinct *Symbiodinium*  
459 species <sup>89</sup>. However, the status of OTUs is less clear; they might represent either unique  
460 *Symbiodinium* genotypes or intragenomic variants <sup>10,17,18</sup> or both, but they are unlikely to  
461 represent distinct *Symbiodinium* species. Nevertheless, in some cases, OTUs map to known

462 ‘types’(see <sup>18</sup>). Therefore, this OTU-based framework infers delineations between the OTU,  
463 subtype, and type levels <sup>18,89</sup>. However, a large proportion of OTUs retrieved in this study are  
464 unlikely to represent intragenomic variants for two reasons. Firstly, the proportion of  
465 intragenomic variants retrieved as OTUs will depend on the methodology used to cluster  
466 sequence variants. Clustering across samples at 97% identity greatly diminishes retrieval of  
467 intragenomic variants <sup>18</sup>. Secondly, in contrast to overestimating diversity, clustering across  
468 samples at 97% identity also results in an underestimation of relevant biological diversity <sup>90</sup>.  
469 As there is no single-copy marker yet known for *Symbiodinium*, sequencing additional  
470 markers would result in intragenomic challenges similar to those found for ITS-2. Therefore,  
471 at this time, sequencing additional markers is not a panacea for dealing with intra-  
472 genomic/multicopy variation. Finally, *Symbiodinium* OTUs listed as “uncultured” were  
473 assigned this term based on their Genbank NCBI identifiers, following verbatim the name  
474 given by the original depositors of these sequences. Quotes around the term were added to  
475 make clear that this is not a functional description or taxonomic designation. Analysis of  
476 rarefaction curves suggested that differences in sequencing depth across samples did not  
477 affect diversity estimates (additional description in Supplementary Methods).

478

#### 479 **Data analysis and visualization**

480 Sample metadata were mapped onto circular trait plots using the package ‘diverstreet’  
481 <sup>91</sup>. To aid in visualizing the data on the *A. tenuis* plots, only OTUs that were found within at  
482 least three samples were kept, reducing the total OTU count from 422 to 134 for 2012  
483 samples and from 568 to 181 for 2013 samples, giving an overall total of 315 OTUs for *A.*  
484 *tenuis*. To determine the overlap in *Symbiodinium* OTUs from *A. tenuis* data between years  
485 that were clustered and mapped separately, the 315 OTUs were aligned in Clustal OMEGA  
486 <sup>92</sup>. OTUs that clustered and blasted to the same accession number (54 of the 315) were  
487 deemed to be the same OTU, resulting in a total of 261 distinct OTUs. In total, 80 unique  
488 OTUs were found in 2012, 127 were found in 2013, and 54 were shared between years.  
489 OTUs with a relative normalized abundance of less than 0.01% were classified as  
490 “background”, whilst those with abundances greater than 0.01% were considered “principal.”  
491 Rare, background types can play an important role in recovery post-bleaching caused by both  
492 low and high temperatures by becoming dominant symbionts <sup>50</sup>. The cut-off of 0.01% chosen  
493 to designate background abundances here is commonly used in microbial, deep sequencing  
494 studies examining rare taxa <sup>93–95</sup>, and has been found to fall within the detection limits of  
495 deep sequencing for *Symbiodinium* <sup>17</sup>. Furthermore, 0.01% represents approximately 100-200

496 cells per square cm<sup>57</sup>, a density of symbionts that has been recognised as ecologically  
497 relevant. For example, a survey of four coral species on the GBR revealed clade D  
498 populations existed, on average, at levels of 100-10,000 cells per cm<sup>2</sup><sup>58</sup>. This study is also the  
499 first to use deep sequencing to identify *Symbiodinium* communities in eggs and juveniles of  
500 corals, and therefore this lower threshold enabled the inclusion of a greater percentage of  
501 *Symbiodinium* communities with which to explore the diversity present in this life stage.  
502 OTUs were further classified by ubiquity across samples, whereby “core” OTUs were  
503 defined as those found in >75% of samples, “common” were found in 25 -75% of samples,  
504 and “rare” were found in < 25%. As far fewer OTUs were recovered from *M. digitata*  
505 samples, all 101 OTUs from the one year sampled were used to visualize and classify them  
506 by abundance and ubiquity, as described above. Differential abundance testing was  
507 performed with ‘DESeq2’, with Benjamini-Hochberg p-adjusted values at 0.05<sup>96-98</sup>.  
508 Networks and heatmaps were constructed using un-weighted Unifrac distances of the  
509 normalized *Symbiodinium* abundances in eggs only, where maximum distances were set at  
510 0.4.

511

## 512 **Heritability analyses**

513 We estimated the effects of host genotype and maternal environment on variation in  
514 *Symbiodinium* diversity using established quantitative genetic methods<sup>5,31</sup>. The extent to  
515 which a trait (such as the host’s *Symbiodinium* community) is genetically regulated can be  
516 represented by the degree to which individuals share the same genes<sup>31</sup>. The degree to which  
517 individuals share the same genes can be determined in at least two ways: 1) using information  
518 on relatedness through the construction of known pedigrees based on either reproductive  
519 crosses (as we have done here), twin data, or known breeding lines; or 2) using genomic  
520 marker data (Quantitative Trait Loci)<sup>30,99-101</sup>. For example, whilst the full genome structure  
521 of twins is often not known in heritability studies, twin studies provide subjects of known  
522 relatedness (full sibs, half sibs), from which host-genotype sharing can be calculated.  
523 Therefore, we have constructed pedigrees of known relatedness using diallel and half-diallel  
524 cross designs to construct the degree to which individuals share the same genes (host  
525 genotype information). Pedigrees of known relatedness were then combined with host  
526 phenotypes for the trait “*Symbiodinium* community” that had been determined through  
527 sequencing. The *Symbiodinium* community is not a “proxy” for host-phenotype; it is the host-  
528 phenotype for symbiosis. In a similar manner, host-phenotypes for symbiosis have been  
529 determined in studies of bacterial gut communities in insects and mammals<sup>39-41</sup>. Heritability



530 analysis therefore uses information on variation among samples in both host-genotype  
531 (calculated here through relatedness coefficients derived from pedigrees) and host-phenotype  
532 (i.e., *Symbiodinium* community determined through sequencing). We do not explicitly  
533 determine which elements of the host genotype regulate the variability in this host trait  
534 (*Symbiodinium* community); such a determination would require Quantitative Trait Loci  
535 analysis. Instead, our objective is to quantify the extent to which this trait is genetically  
536 regulated.

537         The *Symbiodinium* community associated with each adult, juvenile (*A. tenuis*) or egg  
538 (*M. digitata*) of the two coral species was characterized as a continuous quantitative trait of  
539 the host by converting community composition into a single diversity metric. Differences  
540 among juveniles in regards to their *Symbiodinium* communities were examined as a host  
541 phenotypic trait. Collapsing complex assemblage data into a single diversity value (local  
542 diversity measure)<sup>102</sup> was necessary to apply a univariate heritability statistic. Such single  
543 diversity metrics have been used to explore the impact of host-genetic variation on bacterial  
544 symbiont populations residing within hosts across a range of environments in the adult and  
545 infant human body<sup>39,41</sup> as well as in insects<sup>40</sup>. The Leinster and Cobbold diversity metric (D)  
546 incorporates variance-normalized OTU abundances from linear models using negative  
547 binomial distributions, OTU sequence diversity, and OTU rarity in the following equation<sup>102</sup>:

548 
$${}^qD_{ij}^Z(p),$$

549 where “q” is a measure of the relative importance of rare species from 0 (very important) to  
550  $\infty$  (not important), and Z is a matrix of genetic similarities of OTUs i through j. Pairwise  
551 percent similarities between OTUs sequences were calculated in ‘Ape’ with a “raw” model of  
552 molecular evolution, in which the simple proportion of differing nucleotides between  
553 pairwise comparisons is calculated and no assumption is made regarding the probability of  
554 certain nucleotide changes over others. Finally, P is a matrix of normalized abundances  
555 corresponding to each sample and OTU. Incorporating both abundance and diversity of  
556 *Symbiodinium* types into heritability estimates is essential because changes in *Symbiodinium*  
557 community abundance dynamics can change the functional output of the symbiosis as a  
558 whole<sup>26</sup> and are important in determining coral resilience and bleaching susceptibility  
559<sup>25,103,104</sup>. Model inputs therefore take into account which OTUs were present or absent in each  
560 sample, OTU sequence diversity, and the abundance of each OTU.

561         Heritability estimates for both species presented here represent the initial  
562 *Symbiodinium* community with the time of sampling consistent with complete infection (i.e.  
563 defined by the presence of *Symbiodinium* throughout the polyp) of *A. tenuis* juveniles (19 -

564 22.5 days, personal observation, <sup>48,105</sup>). Calculated heritability may vary among traits and  
565 throughout ontogeny (i.e. with body size <sup>106</sup>) and hence we therefore make no predictions  
566 about the heritability of *Symbiodinium* communities at later ontogenic stages. However, as  
567 the early *Symbiodinium* community can influence juvenile survival <sup>82</sup> and because we do not  
568 yet know how the earliest communities impact later ones, evaluating the heritability at this  
569 initial stage is a logical first step.

570 Two methods were used to assess heritability. Bayesian methods are powerful tools  
571 for assessing heritability of natural (i.e. non-lab, non-model) populations and for non-  
572 Gaussian traits (see <sup>5</sup> for a full discussion of the advantages of using Bayesian inference in  
573 quantitative genetics). However, parent-offspring regressions were also calculated to  
574 facilitate comparisons with previous studies as they make up a majority of estimates available  
575 in the literature. The correspondence in heritability estimates between these two methods is  
576 well-established (e.g.  $h^2=0.51$  vs  $0.52$  for *Drosophila melanogaster* traits <sup>31,107</sup>), although  
577 Bayesian MCMC estimates are generally lower <sup>5</sup> and confidence intervals around mean  
578 estimates generally smaller, especially at low levels of heritability <sup>108</sup>. Importantly, neither  
579 method is dependent on the known relatedness of the parents, but instead rely on relatedness  
580 among the juveniles themselves (sib analysis comprised of full and half sibs) or comparisons  
581 between juveniles and adult phenotypes (parent-offspring regressions) <sup>30</sup>.

582

583 **Regression-based estimates of heritability:** Phenotypic values of offspring can be regressed  
584 against parental midpoint (average) phenotypic values, with the slope being equal to the  
585 narrow-sense heritability of the trait of interest <sup>31,32</sup>. Parental midpoint values were calculated  
586 by taking the average of dam and sire *Symbiodinium* diversities for each family and then  
587 regressing these values against diversity values for the offspring of each family. Precision of  
588 the heritability estimate increases when parents vary substantially in the trait of interest <sup>31</sup>.  
589 Coral colonies dominated by a single or mixed *Symbiodinium* communities (C, D, C/D  
590 communities) can be considered biological extremes and ample evidence describes their  
591 contrasting physiological impacts on coral hosts (i.e., growth, bleaching) when associated  
592 with D versus C communities in particular <sup>26</sup>. Therefore, parental colonies selected for  
593 breeding were dominated by C1 (families W5, 10) or had mixed communities of C1/D1  
594 (W7), C1/D1/D1a (W11, PCB4, 6, 8, 9), or multiple A, C1 and D types (OI3, 4, 5, 6) (Fig.  
595 2b).

596

597 **Bayesian linear mixed model estimates of heritability:** Heritability estimates were derived  
598 from estimates of additive genetic variance calculated from the ‘animal model,’ a type of  
599 quantitative genetic mixed effects model incorporating fixed and random effects, and  
600 relatedness coefficients amongst individuals<sup>109</sup>. The animal model was implemented using  
601 Bayesian statistics with the package ‘MCMCglmm’<sup>110</sup>. The model incorporated the diversity  
602 metric calculated for each juvenile and the pedigree coefficient of relatedness as random  
603 effects. Bayesian heritability models were run with  $1.5 \times 10^6$  iterations, a thinning level of 800  
604 (*A. tenuis*) or 250 (*M. digitata*), and a burn-in of 10% of the total iterations. A non-  
605 informative flat prior specification was used, following an inverse gamma distribution<sup>35</sup>.  
606 Assumptions of chain mixing, normality of posterior distributions and autocorrelation were  
607 met. The posterior heritability was calculated by dividing the model variance attributed to  
608 relatedness by the sum of additive and residual variance. The impact of environmental  
609 covariance ( $V_{EC}$ ) was reduced by randomly placing families within the outplant area<sup>31</sup>.  
610 Maternal environmental effects were assessed and were not significant for either *A. tenuis* or  
611 *M. digitata* based on Deviance Information Criteria (DIC) from Bayesian models<sup>35</sup>. The  
612 influence of different settlement surfaces for *A. tenuis* juveniles in 2013 was assessed using  
613 linear mixed models (fixed effect: substrate, random effect: family) in the ‘nlme’ package<sup>111</sup>  
614 using the first principal component extracted from PCoA plots and incorporating weighted  
615 Unifrac distances of normalized *Symbiodinium* abundances for juveniles. Model assumptions  
616 of homogeneity of variance, normality, and linearity were met. Substrate type did not  
617 significantly explain *Symbiodinium* community differences among samples (LME:  $F_{(4)} = 1.05$ ,  
618  $p = 0.38$ ).

619

620 **Impact of intragenomic variation on heritability analysis:** The multicopy nature of  
621 *Symbiodinium* genomes and the presence of intragenomic variants make taxonomic  
622 assignments for distinct *Symbiodinium* sequences difficult, however, advances have been  
623 made to name and elucidate the functional diversity within *Symbiodinium*<sup>112–115</sup>. Single base  
624 pair variations in key genetic regions (e.g., intragenomic spacer region-2 ITS-2) can be the  
625 sole difference between important taxonomic entities, for example, between a new thermally  
626 tolerant C3 type (*S. thermophilum*) and the ubiquitous C3 type<sup>116</sup>; which further highlights  
627 the need for sensitive methodologies. Whilst different methods have been used to incorporate  
628 intragenomic variation into *Symbiodinium* taxonomy designations (i.e. single cell sequencing  
629<sup>117</sup>, and pairwise correlations<sup>10,17,118</sup>), the combination of single-cell sequencing, gel-based  
630 methods and next generation sequencing suggest that clustering at 97 % sequence similarity

631 (the cut-off used here), is sufficient to collapse *Symbiodinium* from clades A, B and C into  
632 type-level designations<sup>18</sup>.

633 Even without accounting for intragenomic variation using the 97% clustering  
634 threshold, heritability analysis should be impacted little by these pseudo-variants given that  
635 intragenomic variants are found within the same genome. These groups of variants would  
636 therefore be inherited together and do little to impact variance between individuals of  
637 different families (which are important for calculating heritability), causing the bias in a  
638 systematic manner. To test this, we employed a three-step approach previously used to  
639 classify intragenomic variants<sup>82</sup> to the *M. digitata* dataset. Initial groups of OTUs were  
640 chosen from those that clustered closely together on the dendrogram as they have higher per  
641 cent similarity relative to other sequences. Correlation coefficients for these groups of closely  
642 clustered OTUs were then calculated, and OTUs having highly positive or negative  
643 correlations coefficients (-1 to -0.8, 0.8 to 1) were identified as candidate intragenomic  
644 variants. To test the impact of accounting for intragenomic variants on Bayesian heritability  
645 analysis, MCMC models were then re-run the same way as described above but now  
646 incorporating intragenomic variants into the new-derived diversity metric.

647

## 648 **References**

- 649 1. Hoegh-Guldberg, O. Climate change, coral bleaching and the future of the world's  
650 coral reefs. *Aust. J. Mar. Freshw. Res.* **50**, 839–866 (1999).
- 651 2. Eakin, C. M., Lough, J. M. & Heron, S. F. in *Coral bleaching* 41–67 (Springer, 2009).
- 652 3. Glynn, P. W. Coral reef bleaching: ecological perspectives. *Coral Reefs* **12**, 1–17  
653 (1993).
- 654 4. Normile, D. El Niño's warmth devastating reefs worldwide. *Science* (80-. ). **352**, 15–  
655 16 (2016).
- 656 5. Charmantier, A., Garant, D. & Kruuk, L. E. B. *Quantitative genetics in the wild*. (OUP  
657 Oxford, 2014).
- 658 6. Hughes, T. P. *et al.* Climate change, human impacts, and the resilience of coral reefs.  
659 *Science* (80-. ). **301**, 929–933 (2003).
- 660 7. Brown, B. E., Le Tissier, M. D. A. & Bythell, J. C. Mechanisms of bleaching deduced  
661 from histological studies of reef corals sampled during a natural bleaching event. *Mar.*  
662 *Biol.* **122**, 655–663 (1995).
- 663 8. Baird, A. H., Bhagooli, R., Ralph, P. J. & Takahashi, S. Coral bleaching: the role of  
664 the host. *Trends Ecol. Evol.* **24**, 16–20 (2009).

- 665 9. Glynn, P. W., Mate, J. L., Baker, A. C. & Calderon, M. O. Coral bleaching and  
666 mortality in Panama and Ecuador during the 1997-1998 El Nino Southern Oscillation  
667 event: spatial/temporal patterns and comparisons with the 1982-1983 event. *Bull. Mar.*  
668 *Sci.* **69**, 79–109 (2001).
- 669 10. Kenkel, C. D. *et al.* Evidence for a host role in thermotolerance divergence between  
670 populations of the mustard hill coral (*Porites astreoides*) from different reef  
671 environments. *Mol. Ecol.* **22**, 4335–4348 (2013).
- 672 11. Hawkins, T. D., Krueger, T., Wilkinson, S. P., Fisher, P. L. & Davy, S. K. Antioxidant  
673 responses to heat and light stress differ with habitat in a common reef coral. *Coral*  
674 *Reefs* **34**, 1229–1241 (2015).
- 675 12. Krueger, T. *et al.* Differential coral bleaching—Contrasting the activity and response  
676 of enzymatic antioxidants in symbiotic partners under thermal stress. *Comp. Biochem.*  
677 *Physiol. Part A Mol. Integr. Physiol.* **190**, 15–25 (2015).
- 678 13. Fellous, S., Duron, O. & Rousset, F. Adaptation due to symbionts and conflicts  
679 between heritable agents of biological information. *Nat. Rev. Genet.* **12**, 663 (2011).
- 680 14. LaJeunesse, T. C. *et al.* Host–symbiont recombination *versus* natural selection in the  
681 response of coral–dinoflagellate symbioses to environmental disturbance. *Proc. R. Soc.*  
682 *B Biol. Sci.* **277**, 2925–2934 (2010).
- 683 15. Pochon, X., Putnam, H., Burki, F. & Gates, R. Identifying and characterizing  
684 alternative molecular markers for the symbiotic and free-living dinoflagellate genus  
685 *Symbiodinium*. *PLoS One* **7**, e29816 (2012).
- 686 16. Baker, A. C. Flexibility and specificity in coral-algal symbiosis: Diversity, ecology,  
687 and biogeography of *Symbiodinium*. *Annu. Rev. Ecol. Evol. Syst.* **34**, 661–689 (2003).
- 688 17. Quigley, K. M. *et al.* Deep-sequencing method for quantifying background abundances  
689 of *Symbiodinium* types: exploring the rare *Symbiodinium* biosphere in reef-building  
690 corals. *PLoS One* **9**, e94297 (2014).
- 691 18. Arif, C. *et al.* Assessing *Symbiodinium* diversity in scleractinian corals via Next  
692 Generation Sequencing based genotyping of the ITS2 rDNA region. *Mol. Ecol.* **23**,  
693 4418–4433 (2014).
- 694 19. Boulotte, N. M. *et al.* Exploring the *Symbiodinium* rare biosphere provides evidence  
695 for symbiont switching in reef-building corals. *ISME J.* (2016).
- 696 20. Kenkel, C. D., Setta, S. P. & Matz, M. V. Heritable differences in fitness-related traits  
697 among populations of the mustard hill coral, *Porites astreoides*. *Heredity (Edinb)*. **115**,  
698 509–516 (2015).

- 699 21. Fabina, N. S., Putnam, H. M., Franklin, E. C., Stat, M. & Gates, R. D. Symbiotic  
700 specificity, association patterns, and function determine community responses to  
701 global changes: defining critical research areas for coral *Symbiodinium* symbioses.  
702 *Glob. Chang. Biol.* **19**, 3306–3316 (2013).
- 703 22. Berkelmans, R. & van Oppen, M. J. H. The role of zooxanthellae in the thermal  
704 tolerance of corals: a ‘nugget of hope’ for coral reefs in an era of climate change. *Proc.*  
705 *R. Soc. B Biol. Sci.* **273**, 2305–2312 (2006).
- 706 23. Bay, L. K., Doyle, J., Logan, M. & Berkelmans, R. Recovery from bleaching is  
707 mediated by threshold densities of background thermo-tolerant symbiont types in a  
708 reef-building coral. *R. Soc. Open Sci.* **3**, 1–10 (2016).
- 709 24. Theis, K. R. *et al.* Getting the hologenome concept right: An eco-evolutionary  
710 framework for hosts and their microbiomes. *mSystems* **1**, e00028–16 (2016).
- 711 25. Cunning, R. & Baker, A. C. Not just who, but how many: the importance of partner  
712 abundance in reef coral symbioses. *Front. Microbiol.* **5**, 400 (2014).
- 713 26. Cunning, R., Silverstein, R. N. & Baker, A. C. Investigating the causes and  
714 consequences of symbiont shuffling in a multi-partner reef coral symbiosis under  
715 environmental change. *Proc. R. Soc. B* **282**, 20141725 (2015).
- 716 27. van Oppen, M. J. H., Oliver, J. K., Putnam, H. M. & Gates, R. D. Building coral reef  
717 resilience through assisted evolution. *Proc. Natl. Acad. Sci.* **112**, 2307–2313 (2015).
- 718 28. Baird, A. H., Guest, J. R. & Willis, B. L. Systematic and biogeographical patterns in  
719 the reproductive biology of scleractinian corals. *Annu. Rev. Ecol. Evol. Syst.* **40**, 551–  
720 571 (2009).
- 721 29. Douglas, A. E. & Werren, J. H. Holes in the hologenome: why host-microbe  
722 symbioses are not holobionts. *MBio* **7**, e02099–15 (2016).
- 723 30. Lynch, M. & Walsh, B. Genetics and analysis of quantitative traits. (1998).
- 724 31. Falconer, D. S. & Mackay, T. F. C. Introduction to Quantitative Genetics. *Longman*  
725 **19**, 1 (1995).
- 726 32. Visscher, P. M., Hill, W. G. & Wray, N. R. Heritability in the genomics era—concepts  
727 and misconceptions. *Nat. Rev. Genet.* **9**, 255–266 (2008).
- 728 33. Hedrick, P. W., Coltman, D. W., Festa-Bianchet, M. & Pelletier, F. Not surprisingly,  
729 no inheritance of a trait results in no evolution. *Proc. Natl. Acad. Sci.* **111**, E4810–  
730 E4810 (2014).
- 731 34. Houle, D. Comparing evolvability and variability of quantitative traits. *Genetics* **130**,  
732 195–204 (1992).

- 733 35. Wilson, A. J. *et al.* An ecologist's guide to the animal model. *J. Anim. Ecol.* **79**, 13–26  
734 (2010).
- 735 36. Franzenburg, S. *et al.* Distinct antimicrobial peptide expression determines host  
736 species-specific bacterial associations. *Proc. Natl. Acad. Sci.* **110**, E3730–E3738  
737 (2013).
- 738 37. Ley, R. E. *et al.* Evolution of mammals and their gut microbes. *Science (80-. )*. **320**,  
739 1647–1651 (2008).
- 740 38. Campbell, J. H. *et al.* Host genetic and environmental effects on mouse intestinal  
741 microbiota. *ISME J.* **6**, 2033–2044 (2012).
- 742 39. Benson, A. K. *et al.* Individuality in gut microbiota composition is a complex  
743 polygenic trait shaped by multiple environmental and host genetic factors. *Proc. Natl.*  
744 *Acad. Sci.* **107**, 18933–18938 (2010).
- 745 40. Parkinson, J. F., Gobin, B. & Hughes, W. O. H. Heritability of symbiont density  
746 reveals distinct regulatory mechanisms in a tripartite symbiosis. *Ecol. Evol.* (2016).
- 747 41. Liu, C. M. *et al.* *Staphylococcus aureus* and the ecology of the nasal microbiome. *Sci.*  
748 *Adv.* **1**, e1400216 (2015).
- 749 42. Davy, S. K., Allemand, D. & Weis, V. M. Cell biology of cnidarian-dinoflagellate  
750 symbiosis. *Microbiol. Mol. Biol. Rev.* **76**, 229–261 (2012).
- 751 43. Kuniya, N. *et al.* Possible involvement of Tachylectin-2-like lectin from *Acropora*  
752 *tenuis* in the process of *Symbiodinium* acquisition. *Fish. Sci.* **81**, 473–483 (2015).
- 753 44. Suzuki, G. *et al.* Early uptake of specific symbionts enhances the post-settlement  
754 survival of *Acropora* corals. *Mar. Ecol. Prog. Ser.* **494**, 149–158 (2013).
- 755 45. Yamashita, H., Suzuki, G., Hayashibara, T. & Koike, K. *Acropora* recruits harbor  
756 'rare' *Symbiodinium* in the environmental pool. *Coral Reefs* **32**, 355–366 (2013).
- 757 46. Gómez-Cabrera, M. del C., Ortiz, J. C., Loh, W. K. W., Ward, S. & Hoegh-Guldberg,  
758 O. Acquisition of symbiotic dinoflagellates (*Symbiodinium*) by juveniles of the coral  
759 *Acropora longicyathus*. *Coral Reefs* **27**, 219–226 (2008).
- 760 47. Cumbo, V. R., Baird, A. H. & van Oppen, M. J. H. The promiscuous larvae: flexibility  
761 in the establishment of symbiosis in corals. *Coral Reefs* 1–10 (2013).
- 762 48. Abrego, D., van Oppen, M. J. H. & Willis, B. L. Highly infectious symbiont dominates  
763 initial uptake in coral juveniles. *Mol. Ecol.* **18**, 3518–3531 (2009).
- 764 49. Nitschke, M. R., Davy, S. K. & Ward, S. Horizontal transmission of *Symbiodinium*  
765 cells between adult and juvenile corals is aided by benthic sediment. *Coral Reefs* 1–10  
766 (2015).

- 767 50. Silverstein, R. The importance of the rare: the role of background *Symbiodinium* in the  
768 response of reef corals to environmental change. (2012).
- 769 51. Jones, A. M., Berkelmans, R., van Oppen, M. J. H., Mieog, J. C. & Sinclair, W. A  
770 community change in the algal endosymbionts of a scleractinian coral following a  
771 natural bleaching event: field evidence of acclimatization. *Proc. R. Soc. B Biol. Sci.*  
772 **275**, 1359–1365 (2008).
- 773 52. LaJeunesse, T. C., Smith, R. T., Finney, J. & Oxenford, H. Outbreak and persistence of  
774 opportunistic symbiotic dinoflagellates during the 2005 Caribbean mass coral  
775 ‘bleaching’ event. *Proc. R. Soc. B Biol. Sci.* **276**, 4139–4148 (2009).
- 776 53. Lee, M. J. *et al.* Most low-abundance ‘background’ *Symbiodinium* spp. are transitory  
777 and have minimal functional significance for symbiotic corals. *Microb. Ecol.* 1–13  
778 (2016). doi:10.1007/s00248-015-0724-2
- 779 54. Bourne, D. G., Morrow, K. M. & Webster, N. S. Insights into the coral microbiome:  
780 underpinning the health and resilience of reef ecosystems. *Annu. Rev. Microbiol.* **70**,  
781 317–340 (2016).
- 782 55. Ainsworth, T. D. *et al.* The coral core microbiome identifies rare bacterial taxa as  
783 ubiquitous endosymbionts. *ISME J.* **9**, 2261–2274 (2015).
- 784 56. Padilla-Gamiño, J. L., Pochon, X., Bird, C., Concepcion, G. T. & Gates, R. D. From  
785 parent to gamete: vertical transmission of *Symbiodinium* (Dinophyceae) ITS2 sequence  
786 assemblages in the reef building coral *Montipora capitata*. *PLoS One* **7**, e38440  
787 (2012).
- 788 57. LaJeunesse, T. C. *et al.* Specificity and stability in high latitude eastern Pacific coral-  
789 algal symbioses. *Limnol. Oceanogr.* **53**, 719–727 (2008).
- 790 58. Mieog, J., van Oppen, M., Cantin, N., Stam, W. & Olsen, J. Real-time PCR reveals a  
791 high incidence of *Symbiodinium*; clade D at low levels in four scleractinian corals  
792 across the Great Barrier Reef: implications for symbiont shuffling. *Coral Reefs* **26**,  
793 449–457 (2007).
- 794 59. Oliver, K. M., Smith, A. H. & Russell, J. A. Defensive symbiosis in the real world–  
795 advancing ecological studies of heritable, protective bacteria in aphids and beyond.  
796 *Funct. Ecol.* **28**, 341–355 (2014).
- 797 60. Moran, N. A., McCutcheon, J. P. & Nakabachi, A. Genomics and evolution of  
798 heritable bacterial symbionts. *Annu. Rev. Genet.* **42**, 165–190 (2008).
- 799 61. Vautrin, E. & Vavre, F. Interactions between vertically transmitted symbionts:  
800 cooperation or conflict? *Trends Microbiol.* **17**, 95–99 (2009).



- 801 62. Hirose, M. & Hidaka, M. Early development of zooxanthella-containing eggs of the  
802 corals *Porites cylindrica* and *Montipora digitata*: The endodermal localization of  
803 zooxanthellae. *Zoolog. Sci.* **23**, 873–881 (2006).
- 804 63. Ulstrup, K. E., Kuhl, M. & Bourne, D. G. Zooxanthellae harvested by ciliates  
805 associated with brown band syndrome of corals remain photosynthetically competent.  
806 *Appl. Environ. Microbiol.* **73**, 1968–1975 (2007).
- 807 64. Hirose, M., Reimer, J. D., Hidaka, M. & Suda, S. Phylogenetic analyses of potentially  
808 free-living *Symbiodinium* spp. isolated from coral reef sand in Okinawa, Japan. *Mar.*  
809 *Biol.* **155**, 105–112 (2008).
- 810 65. Santos, S. R. Comment on Phylogenetic analysis of free-living strain of *Symbiodinium*  
811 isolate from Jiaozhou Bay, PR China. *J. Phycol.* **40**, 395–397 (2004).
- 812 66. Ritson-Williams, R. *et al.* New perspectives on ecological mechanisms affecting coral  
813 recruitment on reefs. *Smithson. Contrib. fo Mar. Sci.* **38**, 437–457 (2009).
- 814 67. Wolf, J. B. & Wade, M. J. What are maternal effects (and what are they not)? *Philos.*  
815 *Trans. R. Soc. B Biol. Sci.* **364**, 1107–1115 (2009).
- 816 68. Weis, V., Reynolds, W., DeBoer, M. & Krupp, D. Host-symbiont specificity during  
817 onset of symbiosis between the dinoflagellates *Symbiodinium* spp. and planula larvae  
818 of the scleractinian coral *Fungia scutaria*. *Coral Reefs* **20**, 301–308 (2001).
- 819 69. Schwarz, J. A., Krupp, D. A. & Weis, V. M. Late larval development and onset of  
820 symbiosis in the scleractinian coral *Fungia scutaria*. *Biol. Bull.* **196**, 70–79 (1999).
- 821 70. Markell, D. A. & Wood-Charlson, E. M. Immunocytochemical evidence that  
822 symbiotic algae secrete potential recognition signal molecules in hospite. *Mar. Biol.*  
823 **157**, 1105–1111 (2010).
- 824 71. Bay, L. K. *et al.* Infection dynamics vary between *Symbiodinium* types and cell surface  
825 treatments during establishment of endosymbiosis with coral larvae. *Diversity* **3**, 356–  
826 374 (2011).
- 827 72. Fransolet, D., Roberty, S. & Plumier, J.-C. Establishment of endosymbiosis: The case  
828 of cnidarians and *Symbiodinium*. *J. Exp. Mar. Bio. Ecol.* **420-421**, 1–7 (2012).
- 829 73. Mohamed, A. R. *et al.* The transcriptomic response of the coral *Acropora digitifera* to  
830 a competent *Symbiodinium* strain: the symbiosome as an arrested early phagosome.  
831 *Mol. Ecol.* (2016).
- 832 74. Schnitzler, C. E. & Weis, V. M. Coral larvae exhibit few measurable transcriptional  
833 changes during the onset of coral-dinoflagellate endosymbiosis. *Mar. Genomics* **3**,  
834 107–116 (2010).

- 835 75. Cho, J. The heritable immune system. *Nat. Biotechnol.* **33**, 608–609 (2015).
- 836 76. Roederer, M. *et al.* The genetic architecture of the human immune system: a  
837 bioresource for autoimmunity and disease pathogenesis. *Cell* **161**, 387–403 (2015).
- 838 77. Gates, R. D., Hoegh-Guldberg, O., McFall-Ngai, M. J., Bil, K. Y. & Muscatine, L.  
839 Free amino acids exhibit anthozoan ‘host factor’ activity: They induce the release of  
840 photosynthate from symbiotic dinoflagellates *in-vitro*. *Proc. Natl. Acad. Sci.* **92**, 7430–  
841 7434 (1995).
- 842 78. Lee, S. T. M., Davy, S. K., Tang, S.-L. & Kench, P. S. Mucus sugar content shapes the  
843 bacterial community structure in thermally stressed *Acropora muricata*. *Front.*  
844 *Microbiol.* **7**, (2016).
- 845 79. Hagedorn, M. *et al.* Trehalose is a chemical attractant in the establishment of coral  
846 symbiosis. *PLoS One* **10**, e0117087 (2015).
- 847 80. Lewis, Z. T. *et al.* Maternal fucosyltransferase 2 status affects the gut bifidobacterial  
848 communities of breastfed infants. *Microbiome* **3**, 1 (2015).
- 849 81. Golberg, K., Eltzov, E., Shnit-Orland, M., Marks, R. S. & Kushmaro, A.  
850 Characterization of quorum sensing signals in coral-associated bacteria. *Microb. Ecol.*  
851 **61**, 783–792 (2011).
- 852 82. Quigley, K. M., Willis, B. L. & Bay, L. K. Maternal effects and *Symbiodinium*  
853 community composition drive differential patterns in juvenile survival in the coral  
854 *Acropora tenuis*. *R. Soc. Open Sci.* **3**, 1–17 (2016).
- 855 83. Gloor, G. B. *et al.* Type I repressors of P element mobility. *Genetics* **135**, 81–95  
856 (1993).
- 857 84. Edgar, R. C. UPARSE: highly accurate OTU sequences from microbial amplicon  
858 reads. *Nat. Methods* **10**, 996–998 (2013).
- 859 85. Altschul, S. F., Gish, W., Miller, W., Myers, E. W. & Lipman, D. J. Basic local  
860 alignment search tool. *J. Mol. Biol.* **215**, 403–410 (1990).
- 861 86. Camacho, C. *et al.* BLAST+: architecture and applications. *BMC Bioinformatics* **10**,  
862 (2009).
- 863 87. Tonk, L., Bongaerts, P., Sampayo, E. M. & Hoegh-Guldberg, O. SymbioGBR: a web-  
864 based database of *Symbiodinium* associated with cnidarian hosts on the Great Barrier  
865 Reef. *BMC Ecol.* **13**, 7 (2013).
- 866 88. Franklin, E. C., Stat, M., Pochon, X., Putnam, H. M. & Gates, R. D. GeoSymbio: a  
867 hybrid, cloud-based web application of global geospatial bioinformatics and  
868 ecoinformatics for *Symbiodinium*-host symbioses. *Mol. Ecol. Resour.* **12**, 369–373

- 869 (2012).
- 870 89. Ziegler, M. *et al.* Biogeography and molecular diversity of coral symbionts in the  
871 genus *Symbiodinium* around the Arabian Peninsula. *J. Biogeogr.* (2017).
- 872 90. Cunning, R., Gates, R. D. & Edmunds, P. J. *Using high-throughput sequencing of ITS2*  
873 *to describe Symbiodinium metacommunities in St. John, US Virgin Islands.* (PeerJ  
874 Preprints, 2017).
- 875 91. FitzJohn, R. G. Diversitree: comparative phylogenetic analyses of diversification in R.  
876 *Methods Ecol. Evol.* **3**, 1084–1092 (2012).
- 877 92. Sievers, F. *et al.* Fast, scalable generation of high-quality protein multiple sequence  
878 alignments using Clustal Omega. *Mol. Syst. Biol.* **7**, (2011).
- 879 93. Galand, P. E., Casamayor, E. O., Kirchman, D. L. & Lovejoy, C. Ecology of the rare  
880 microbial biosphere of the Arctic Ocean. *Proc. Natl. Acad. Sci.* **106**, 22427–22432  
881 (2009).
- 882 94. Pedrós-Alió, C. The Rare Bacterial Biosphere. *Ann. Rev. Mar. Sci.* **4**, 449–466 (2012).
- 883 95. Logares, R. *et al.* Patterns of rare and abundant marine microbial eukaryotes. *Curr.*  
884 *Biol.* **24**, 813–821 (2014).
- 885 96. Love, M. I., Huber, W. & Anders, S. Moderated estimation of fold change and  
886 dispersion for RNA-seq data with DESeq2. *Genome Biol.* **15**, 1–21 (2014).
- 887 97. McMurdie, P. J. & Holmes, S. phyloseq: an R package for reproducible interactive  
888 analysis and graphics of microbiome census data. *PLoS One* **8**, e61217 (2013).
- 889 98. R Core Team. R: A language and environment for statistical computing. (2012).
- 890 99. Spor, A., Koren, O. & Ley, R. Unravelling the effects of the environment and host  
891 genotype on the gut microbiome. *Nat. Rev. Microbiol.* **9**, 279–290 (2011).
- 892 100. Meyer, E. *et al.* Genetic variation in responses to a settlement cue and elevated  
893 temperature in the reef-building coral *Acropora millepora*. *Mar Ecol Prog Ser* **392**,  
894 81–92 (2009).
- 895 101. Kenkel, C. D., Traylor, M. R., Wiedenmann, J., Salih, A. & Matz, M. V. Fluorescence  
896 of coral larvae predicts their settlement response to crustose coralline algae and reflects  
897 stress. *Proc. R. Soc. B Biol. Sci.* (2011). doi:10.1098/rspb.2010.2344
- 898 102. Leinster, T. & Cobbold, C. A. Measuring diversity: the importance of species  
899 similarity. *Ecology* **93**, 477–489 (2012).
- 900 103. Cunning, R. & Baker, A. C. Excess algal symbionts increase the susceptibility of reef  
901 corals to bleaching. *Nat. Clim. Chang.* (2012).
- 902 104. Cunning, R. *et al.* Dynamic regulation of partner abundance mediates response of reef

- 903 coral symbioses to environmental change. *Ecology* **96**, 1411–1420 (2015).
- 904 105. Abrego, D., van Oppen, M. J. H. & Willis, B. L. Onset of algal endosymbiont  
905 specificity varies among closely related species of *Acropora* corals during early  
906 ontogeny. *Mol. Ecol.* **18**, 3532–3543 (2009).
- 907 106. Wilson, A. J., Kruuk, L. E. B. & Coltman, D. W. Ontogenetic patterns in heritable  
908 variation for body size: using random regression models in a wild ungulate population.  
909 *Am. Nat.* **166**, E177–E192 (2005).
- 910 107. Clayton, G. A., Morris, J. A. & Robertson, A. An experimental check on quantitative  
911 genetical theory I. Short-term responses to selection. *J. Genet.* **55**, 131–151 (1957).
- 912 108. Villemereuil, P., Gimenez, O. & Doligez, B. Comparing parent–offspring regression  
913 with frequentist and Bayesian animal models to estimate heritability in wild  
914 populations: a simulation study for Gaussian and binary traits. *Methods Ecol. Evol.* **4**,  
915 260–275 (2013).
- 916 109. Kruuk, L. E. B. Estimating genetic parameters in natural populations using the ‘animal  
917 model’. *Philos. Trans. R. Soc. London B Biol. Sci.* **359**, 873–890 (2004).
- 918 110. Hadfield, J. D. MCMC methods for multi-response generalized linear mixed models:  
919 the MCMCglmm R package. *J. Stat. Softw.* **33**, 1–22 (2010).
- 920 111. Pinheiro, J., Bates, D., DebRoy, S. & Sarkar, D. Core Team R. 2014. Nlme: linear and  
921 nonlinear mixed effects models. R package version 3.1-118.
- 922 112. Wham, D., Pettay, D. & LaJeunesse, T. Microsatellite loci for the host-generalist  
923 ‘zooxanthella’ & *Symbiodinium trenchi* and other Clade D *Symbiodinium*. *Conserv.*  
924 *Genet. Resour.* **3**, 541–544 (2011).
- 925 113. LaJeunesse, T. C. *et al.* Ecologically differentiated stress-tolerant endosymbionts in the  
926 dinoflagellate genus *Symbiodinium* (Dinophyceae) Clade D are different species.  
927 *Phycologia* **53**, 305–319 (2014).
- 928 114. Parkinson, J. E., Coffroth, M. A. & LaJeunesse, T. C. New species of Clade B  
929 *Symbiodinium* (Dinophyceae) from the greater Caribbean belong to different  
930 functional guilds: *S. aenigmaticum* sp. nov., *S. antillogorgium* sp. nov., *S.*  
931 *endomadracis* sp. nov., and *S. pseudominutum* sp. nov. *J. Phycol.* **51**, 850–858 (2015).
- 932 115. Thornhill, D. J., Lewis, A. M., Wham, D. C. & LaJeunesse, T. C. Host-specialist  
933 lineages dominate the adaptive radiation of reef coral endosymbionts. *Evolution (N. Y.)*  
934 **68**, 352–367 (2014).
- 935 116. Hume, B. C. C. *et al.* *Symbiodinium thermophilum* sp. nov., a thermotolerant symbiotic  
936 alga prevalent in corals of the world’s hottest sea, the Persian/Arabian Gulf. *Sci. Rep.*

937           **5**, 1–8 (2015).

938 117. Wilkinson, S. P., Pontasch, S., Fisher, P. L. & Davy, S. K. The distribution of intra-  
939           genomically variable dinoflagellate symbionts at Lord Howe Island, Australia. *Coral*  
940           *Reefs* **35**, 565–576 (2016).

941 118. Green, E. A., Davies, S. W., Matz, M. V & Medina, M. Quantifying cryptic  
942           *Symbiodinium* diversity within *Orbicella faveolata* and *Orbicella franksi* at the Flower  
943           Garden Banks, Gulf of Mexico. *PeerJ* **2**, e386 (2014).

944

#### 945 **Acknowledgements**

946           We would like to thank Margaux Hein, Mikhail Matz, Marie Strader, Greg Torda,  
947           Sarah Davies, Natalie Andrade, Tess Hill and the staff at Orpheus Island Research Station for  
948           help with field work and spawning at Orpheus Island. We also thank Dr. Ray Berkelmans and  
949           the crew on the RV Ferguson for help with the collection of corals from the northern GBR.

950           All samples of *A. tenuis* from Wilkie Island and Orpheus Island and *M. digitata* from  
951           Orpheus Island were collected under Great Barrier Reef Marine Park Authority permits:  
952           G12/35236.1, G13/36318.1, and G10/33312.1. Funding was provided by the Australian  
953           Research Council through ARC CE1401000020, ARC DP130101421 to B.L.W. and AIMS to  
954           L.K.B.

955

#### 956 **Author Contributions**

957           K.M.Q., B.L.W., and L.K.B. designed and conducted the experiments, K.M.Q. analysed the  
958           data and wrote the manuscript, and all authors made comments on the manuscript.

959

960 **Competing Financial Interest:** The authors declare no competing financial interests.

961 **Data availability statement:** All raw sequencing data will be deposited in the NCBI  
962           Sequence Read Archive under Accession number SRX.

963

964 **Figure 1.** Circular trait plots of 261 *Symbiodinium* ITS-2 OTUs retrieved from *Acropora*  
965           *tenuis* juveniles and adults in 2012 (a) and 2013 (b). Plots include only those OTUs that were  
966           retrieved from three or more samples (134/422 OTUs in 2012 and 181/568 OTUs in 2013).  
967           Concentric circles from innermost to the outermost position represent OTUs present: 1) life-  
968           stage, 2) normalized abundance (principal: > 0.01%, background < 0.01%), and 3) ubiquity  
969           (core: >75% of samples, common: 25-75%, rare: < 25%). OTU identity with an asterisk  
970           indicates it was retrieved in both years. Semi-transparent backgrounds represent clade

971 designations of individual OTUs. See Supplementary Table S8 for full taxonomic  
972 information.

973

974 **Figure 2.** Barplots of variance-normalized abundances of *Symbiodinium* diversity associated  
975 with (a) juveniles and (b) adults of *Acropora tenuis* used in 2012 (Year 1) and 2013 (Year 2)  
976 crosses. Colours represent different *Symbiodinium* types. Origins of parent colonies are  
977 Orpheus and Wilkie reefs. *A. tenuis* adult colonies from Orpheus used for 2013 crosses  
978 included samples that were sequenced that represent the left side of the colony (L), center of  
979 the colony (C), and right side of the colony (R) to examine intra-colony *Symbiodinium*  
980 diversity.

981

982 **Figure 3.** Circular trait plots of 101 *Symbiodinium* ITS-2 OTUs retrieved from *Montipora*  
983 *digitata* eggs and adults. Concentric circles from innermost to the outermost position  
984 represent OTUs present: 1) life-stage, 2) normalized abundance (principal: > 0.01%,  
985 background < 0.01%), 3) ubiquity (core: >75% of samples, common: 25-75%, rare: < 25%),  
986 and 4) dam identity. Semi-transparent backgrounds represent clade designations of individual  
987 OTUs. Red text indicates OTUs that were found in three or more eggs or adults. See  
988 Supplementary Table S8 for full taxonomic information.

989

990 **Figure 4.** Barplot of variance-normalized abundances of only the background *Symbiodinium*  
991 diversity associated with dams and eggs of *Montipora digitata*. Colours represent different  
992 *Symbiodinium* types. The dominant type, C15, was excluded for clarity. The first bar in each  
993 group is the spawning dam and the following bars represent her eggs. The tenth egg sample  
994 from dam 11 (M11) was made up of 100% C15, and was therefore not shown.

995

996 **Figure 5.** Posterior distributions of the heritability estimates for *A. tenuis* (dark grey) and *M.*  
997 *digitata* (light grey) generated from Bayesian MCMCglmm models. Dashed and full lines  
998 correspond to distribution modes and means, respectively.

999

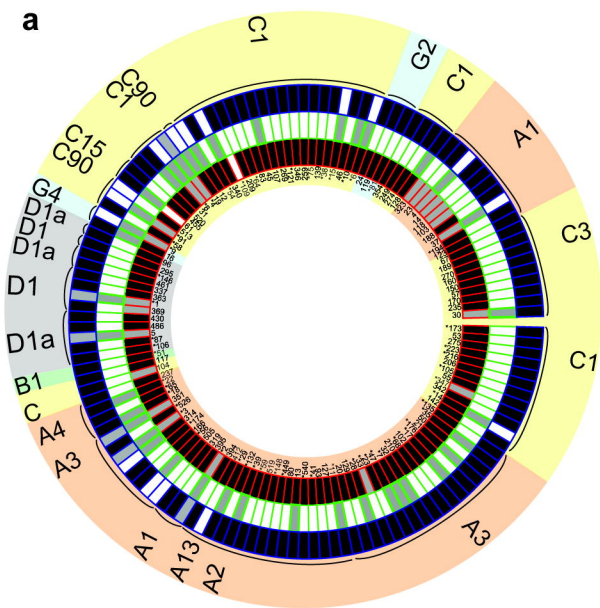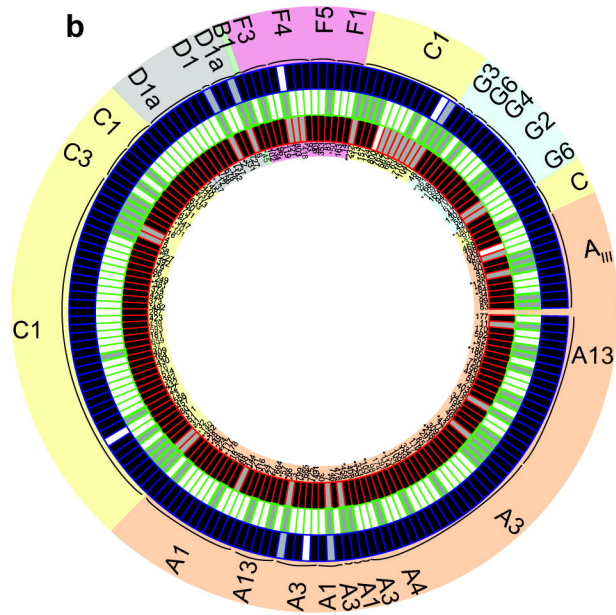

**Clade:**

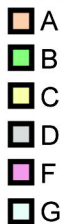

**Life stage:** ■ Only adults ■ Only juveniles ■ Both

**Abundance:** ■ Dominant ■ Background

**Ubiquity:** ■ Core ■ Common ■ Rare

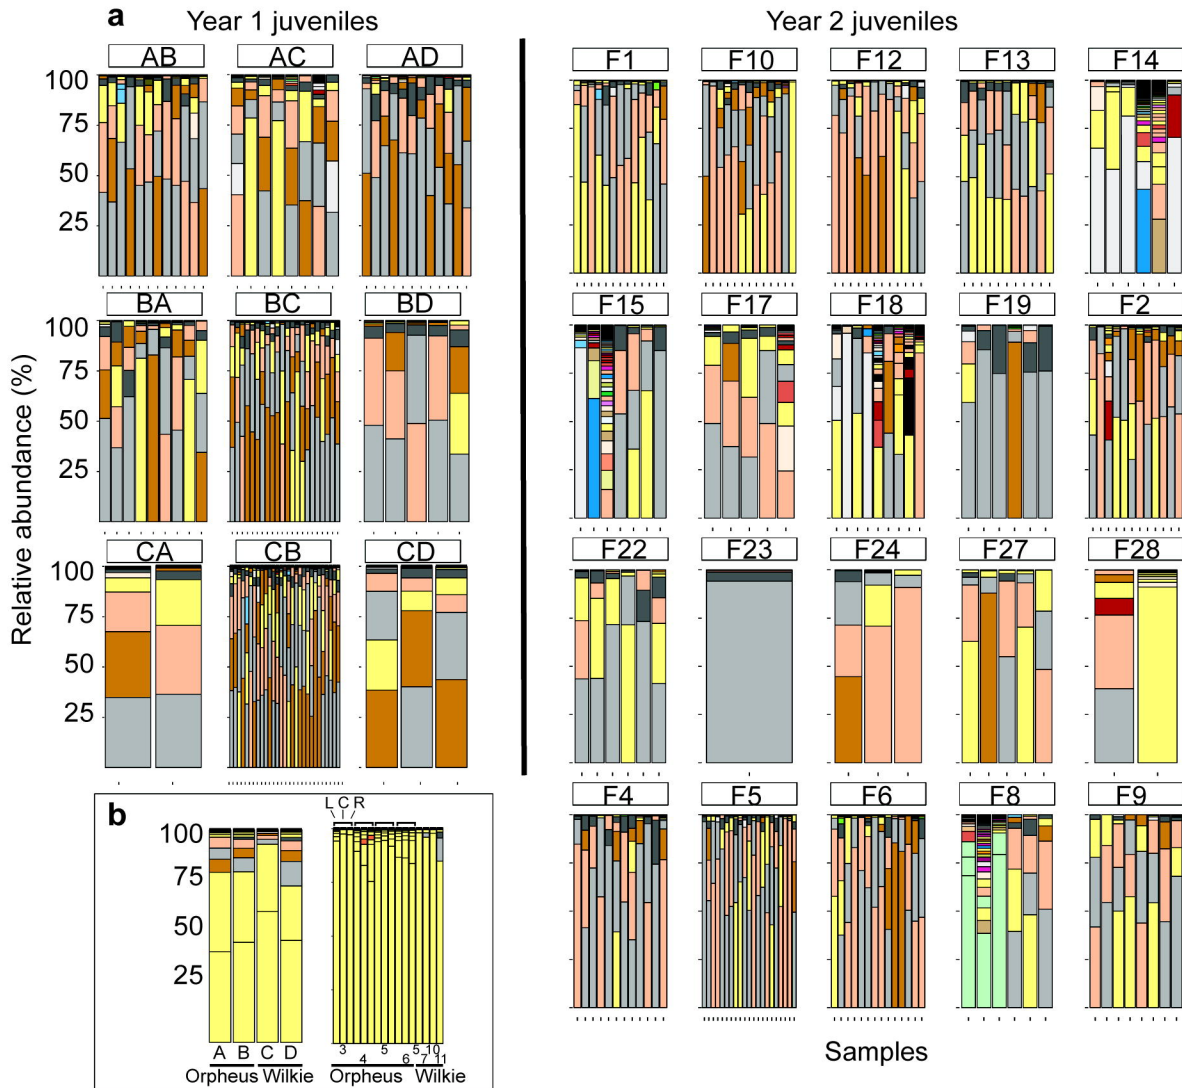

■ *S. microadriaticum* (A1)  
 ■ *S. pilosum* (A2)  
 ■ *S. tridacnidorum* (A3)  
 ■ *S. linucheae* (A4)  
 ■ *S. natans*  
 ■ *S. necroappetens* (A13)  
 ■ *S. minutum* (B1)  
 ■ *S. psygrophilum* (B2)  
 ■ *S. muscatinei* (B4)  
 ■ B16

■ *S. goreau* (C1)  
 ■ C3  
 ■ C15  
 ■ C33  
 ■ C90  
 ■ C91  
 ■ D  
 ■ *S. glynnii* (D1)  
 ■ *S. trenchii* (D1a)

■ *S. voratum* (E)  
 ■ *S. kawagutii* (F1)  
 ■ F2  
 ■ F3  
 ■ F4  
 ■ F5  
 ■ G2  
 ■ G3  
 ■ G4  
 ■ G6  
 ■ H1  
 ■ I



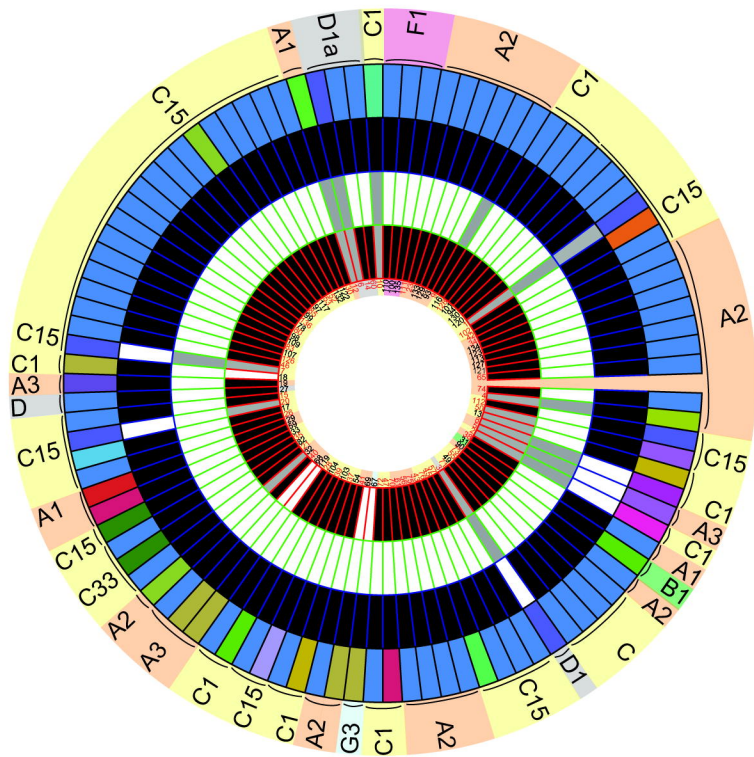

**Life stage:**

- Only adults
- Only juveniles
- Both

**Abundance:**

- Dominant
- Background

**Ubiquity:**

- Core
- Common
- Rare

**Clade:**

- |                                             |                                                       |                                                            |                                                       |
|---------------------------------------------|-------------------------------------------------------|------------------------------------------------------------|-------------------------------------------------------|
| <span style="color: orange;">■</span> A     | <span style="color: blue;">■</span> 29                | <span style="color: lightgreen;">■</span> 8                | <span style="color: darkgreen;">■</span> 9            |
| <span style="color: lightgreen;">■</span> B | <span style="color: magenta;">■</span> 24,28,29,7,8,9 | <span style="color: red;">■</span> 28                      | <span style="color: purple;">■</span> 7               |
| <span style="color: yellow;">■</span> C     | <span style="color: blue;">■</span> All dams          | <span style="color: cyan;">■</span> 28,32                  | <span style="color: lightgreen;">■</span> 26,28,29,32 |
| <span style="color: orange;">■</span> D     | <span style="color: magenta;">■</span> 26             | <span style="color: orange;">■</span> 8,28,32              | <span style="color: limegreen;">■</span> 24,7         |
| <span style="color: pink;">■</span> F       | <span style="color: olivegreen;">■</span> Adult only  | <span style="color: lightgreen;">■</span> 11,24,26,28,29,9 |                                                       |
| <span style="color: grey;">■</span> G       | <span style="color: olivegreen;">■</span> 32          | <span style="color: purple;">■</span> 11,24,26,28,29,7,8,9 |                                                       |
|                                             | <span style="color: lightblue;">■</span> 8,9          | <span style="color: purple;">■</span> 11,24,26,28,32,7,8,9 |                                                       |
|                                             | <span style="color: lightgreen;">■</span> 11          | <span style="color: lightgreen;">■</span> 24               |                                                       |

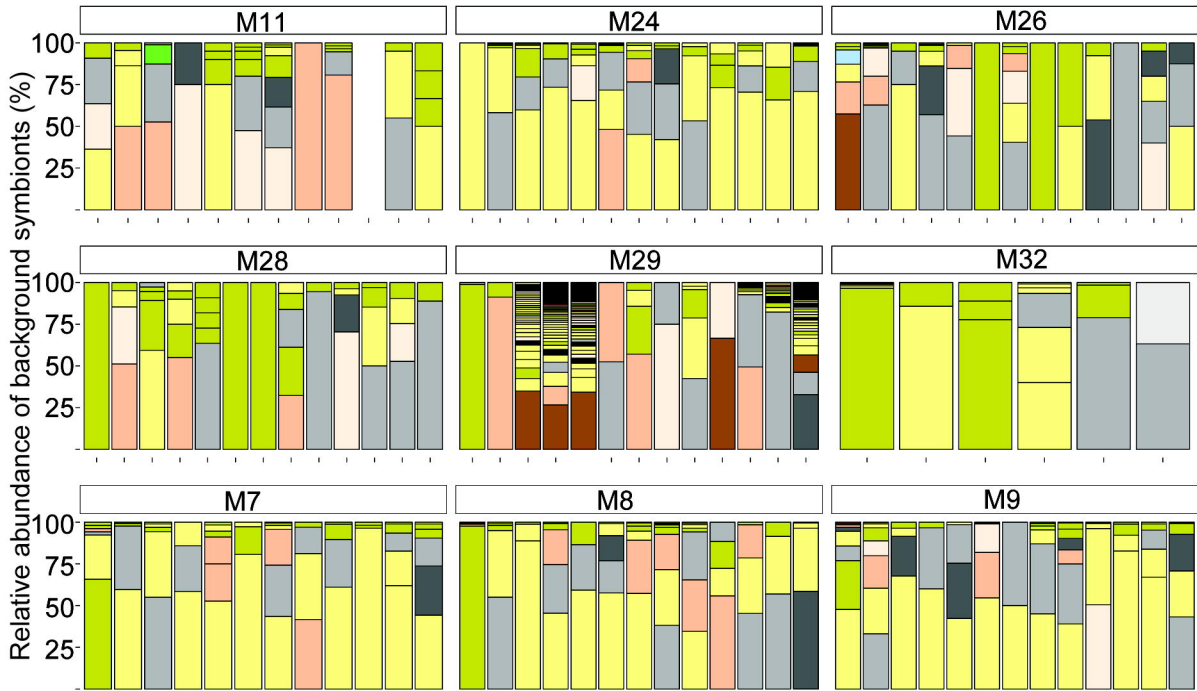

*S. microadriaticum* (A1)  
 *S. pilosum* (A2)  
 *S. tridacnidorum* (A3)  
 *S. minutum* (B1)

*S. goreau* (C1)  
 C15  
 C33

D  
 *S. glynnii* (D1)  
 *S. trenchii* (D1a)  
 *S. voratum* (E)  
 F2  
 G3

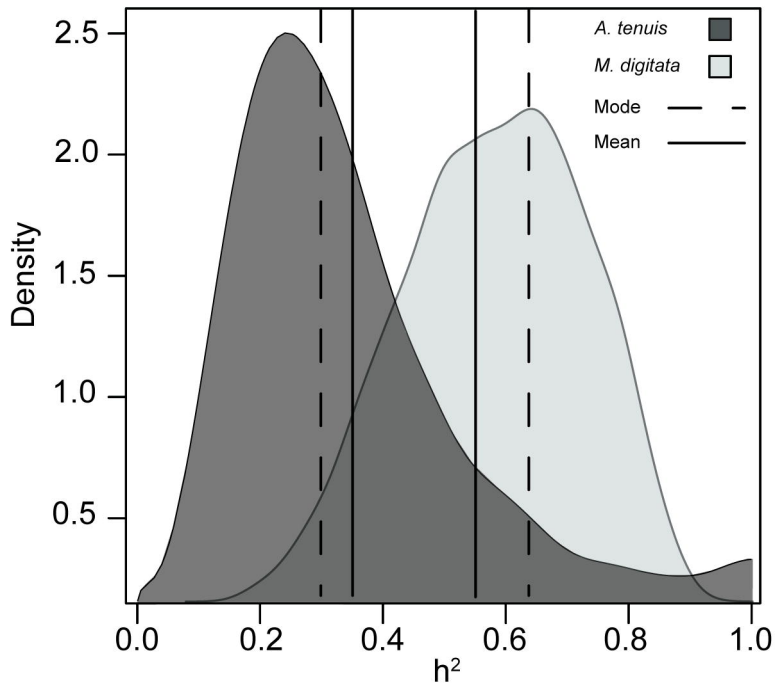

Source: https://www.biorxiv.org/content/10.1101/100453v3.full.pdf
